# Supplementary material for: Lifetime Risk of Cardiovascular Disease Among Individuals With and Without Diabetes Stratified by Obesity Status in the Framingham Heart Study
Source: Oxford University Press journal article supplement (doi:10.2337/dc08-0025), 2008-06-07

*Study Sample*

For the current study, we included participants in the Original Cohort or Offspring Cohort who were at least 50 years of age and free of CVD, followed until a maximum age of 89 for the development of CVD, resulting in 4574 Original Cohort participants (2590 women), and 3714 Offspring participants (1963 women).

*Outcome ascertainment*

CVD events were defined as myocardial infarction, coronary insufficiency, angina pectoris, coronary heart disease death, stroke, transient ischemic attack, intermittent claudication or congestive heart failure and were adjudicated by a physician panel (1).

*Diabetes Diagnosis and Body Mass Index Ascertainment*

Diabetes was diagnosed by either fasting plasma glucose ≥126 mg/dL (7.0 mmol/l) (offspring examinations), non-fasting plasma glucose ≥200 mg/dL (11.1 mmol/l) (original cohort examinations), or treatment with insulin or oral hypoglycemic agents (both cohorts). The majority of diabetes in the Framingham Heart Study is type 2 diabetes. Body mass index (BMI) was measured at the time of first visit attended when the participant was at least 50 years of age.

Reference List

1. Cupples L.A. and D'Agostino R.B. Some risk factors related to the annual incidence of cardiovascular disease and death using pooled repeated biennial measurements: Framingham Study, 30-year follow-up. In: Kannel WB, Polf PA, Garrison RJ, eds. The Framingham Heart Study: *An Epidemiological Investigation of Cardiovascular Disease.* Washington, DC: Government Printing Office. NIH Publication 87-203, section 34. 1987.

**Figure Legends**

Online Supplemental Figure – Lifetime risk of developing cardiovascular disease as presented by a percent risk among those with and without diabetes stratified by BMI category, original cohort only.


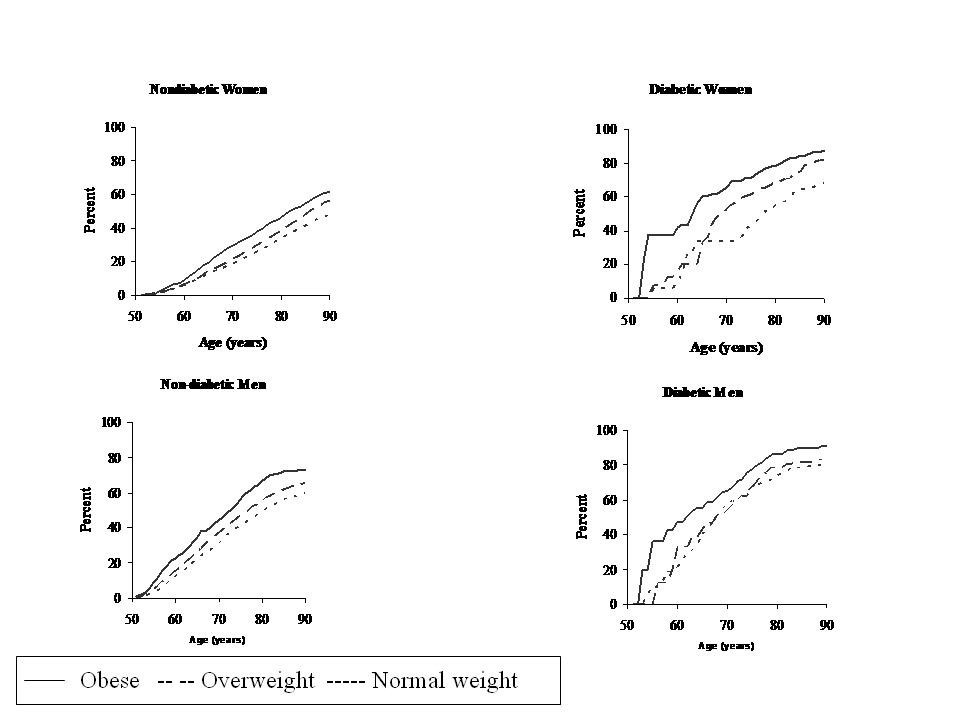

Supplement: dc080025-sup-methods_and_figure.doc [file dc080025-sup-methods_and_figure.doc]
